# Supplementary material for: Absaugung bei intubierten und tracheotomierten Patient*innen
Source: Springer Nature journal article supplement (doi:10.1007/s00101-024-01400-w), 2024-04-16
Supplement: MOESM2 [file 26984726]

Zusatzmaterial zum Beitrag „Absaugung bei intubierten und tracheotomierten Patient\*innen“ von Lars Krüger, Thomas Mannebach, Franziska Wefer et al. (2024) in *Die Anaesthesiologie*  
 Beitrag und Zusatzmaterial stehen Ihnen auf [www.springermedizin.de](http://www.springermedizin.de) zur Verfügung. Bitte geben Sie dort den Beitragstitel in die Suche ein.

## Recherchestrategie

|                    |                                                                                                                                                                                           |
|--------------------|-------------------------------------------------------------------------------------------------------------------------------------------------------------------------------------------|
| CINAHL             | TX suction* AND TX ( (close* OR open) ) AND TX ( (hospital or acute setting or inpatient or ward) ) AND TX ( (breath* OR ventilation OR "mechanical ventilation") )                       |
| Cochrane Library   | #1 suction<br>#2 close* OR open<br>#3 hospital OR clinic<br>#4 adult* OR child<br>#5 breath* OR ventilation OR "mechanical ventilation"<br>#6 #1 AND #2 AND #3 AND #4<br>[Search manager] |
| Livivo             | ((suction* AND (close OR open)) AND (hospital OR clinic)) AND (breath* OR ventilation OR "mechanical ventilation") [Open search]                                                          |
| Medline via PubMed | (suction*) AND (close* OR open) AND (hospital OR clinic) AND (breath* OR ventilation OR "mechanical ventilation") [All Fields]                                                            |

Aktualisierung am 09.05.2023
